# Supplementary material for: SIRT2-mediated ACSS2 K271 deacetylation suppresses lipogenesis under nutrient stress
Source: eLife journal article supplement (doi:10.7554/elife.97019), 2024-04-22
Supplement: fig1-data1 [file elife-97019-fig1-data1-v1.zip]

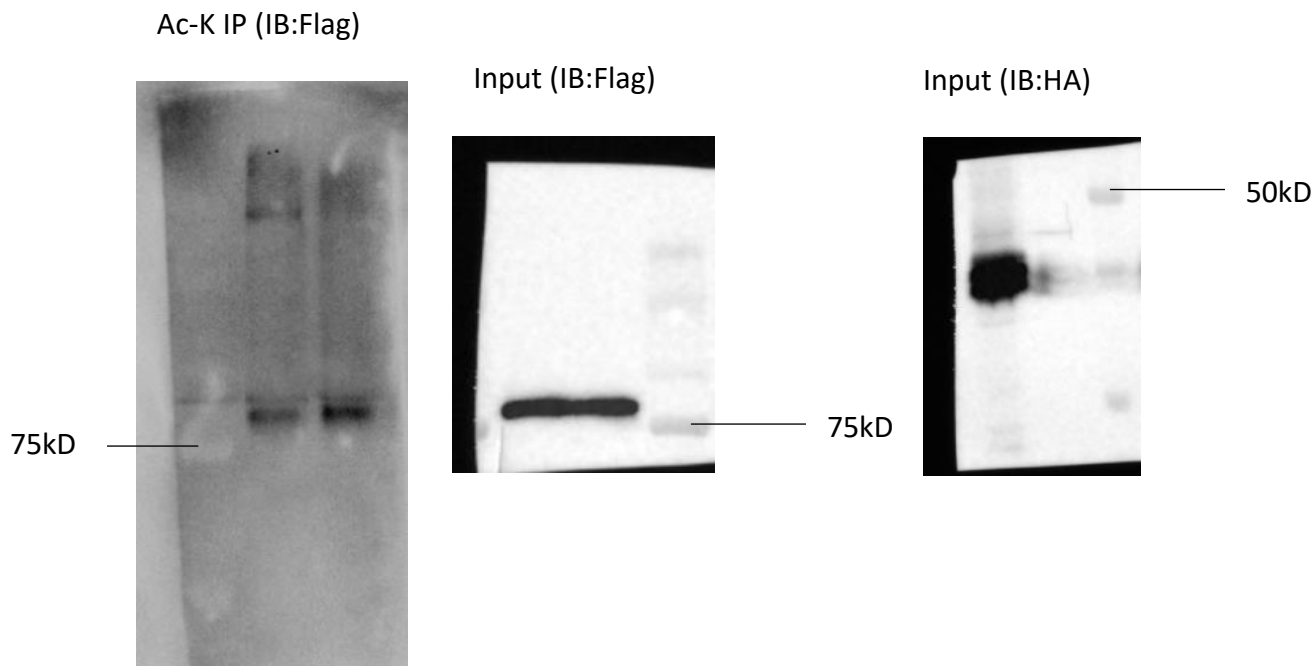

Figure 1, Source Data 1. Original membranes corresponding to Figure 1 A. BioRad protein ladder was used. Molecular weight for ACSS2 (78kD) and SIRT2 (43kD) are labelled.

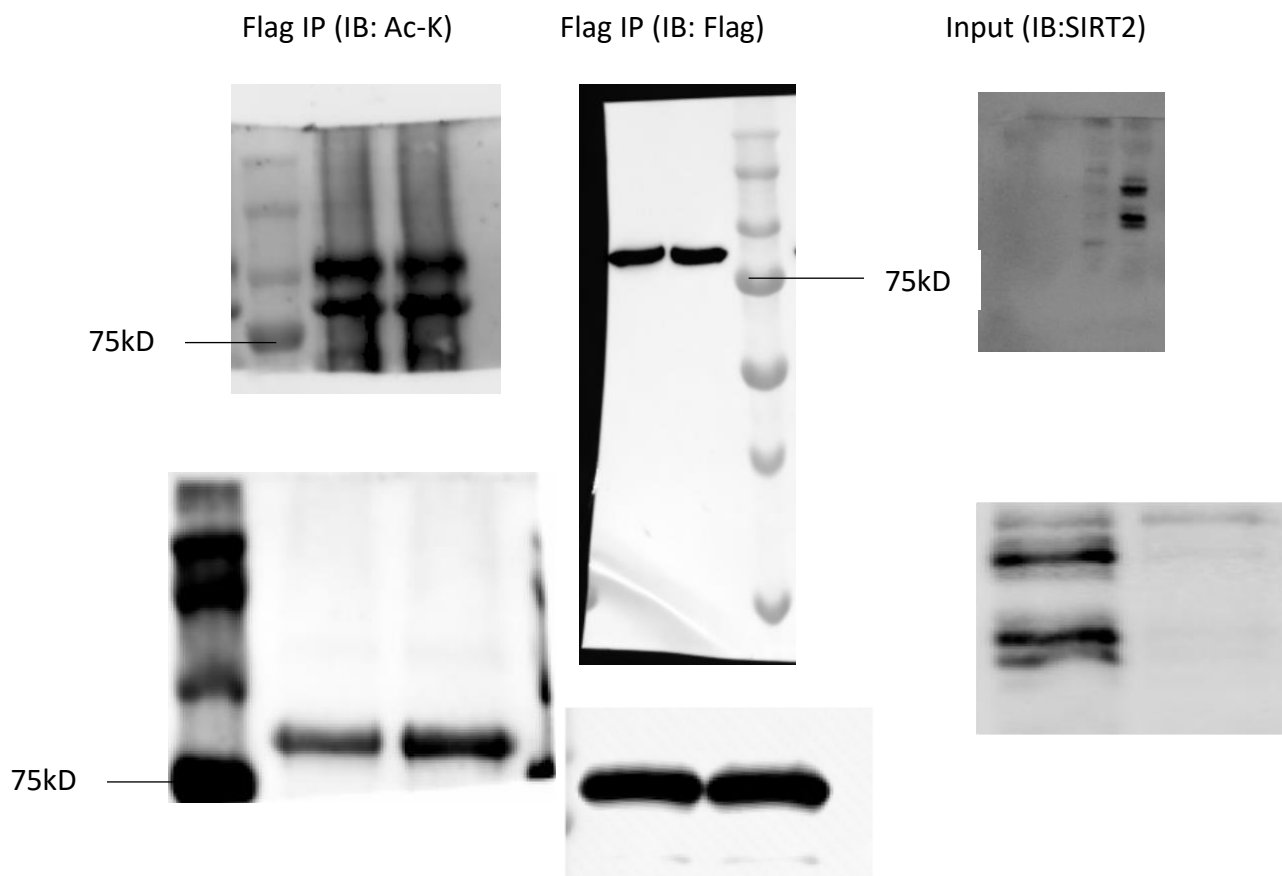

Figure 1, Source Data 1. Original membranes corresponding to Figure 1 B. BioRad protein ladder was used. Molecular weight for ACSS2 (78kD) is labelled.

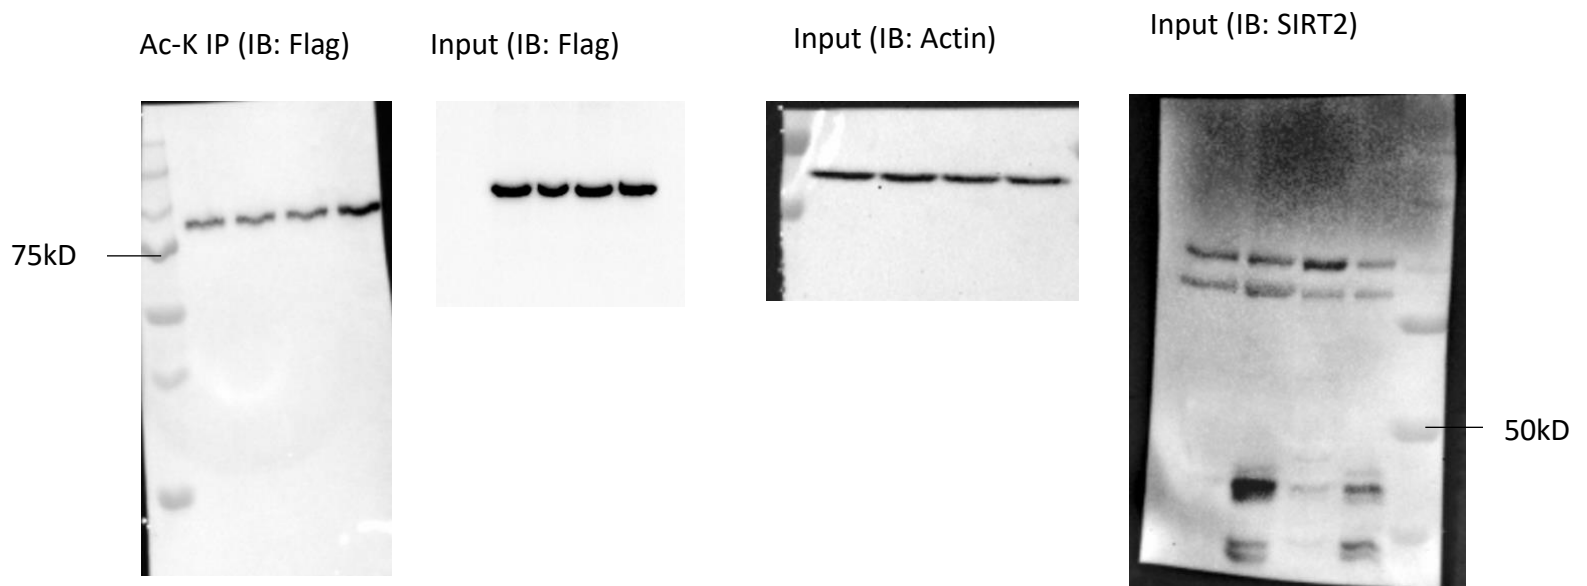

Figure 1, Source Data 1. Original membranes corresponding to Figure 1 C. BioRad protein ladder was used. Molecular weight for ACSS2 (78kD) and SIRT2 (43kD) are labelled.
