# Supplementary material for: SIRT2-mediated ACSS2 K271 deacetylation suppresses lipogenesis under nutrient stress
Source: eLife journal article supplement (doi:10.7554/elife.97019), 2024-04-22
Supplement: fig1-figsupp1-data1 [file elife-97019-fig1-figsupp1-data1-v1.zip]

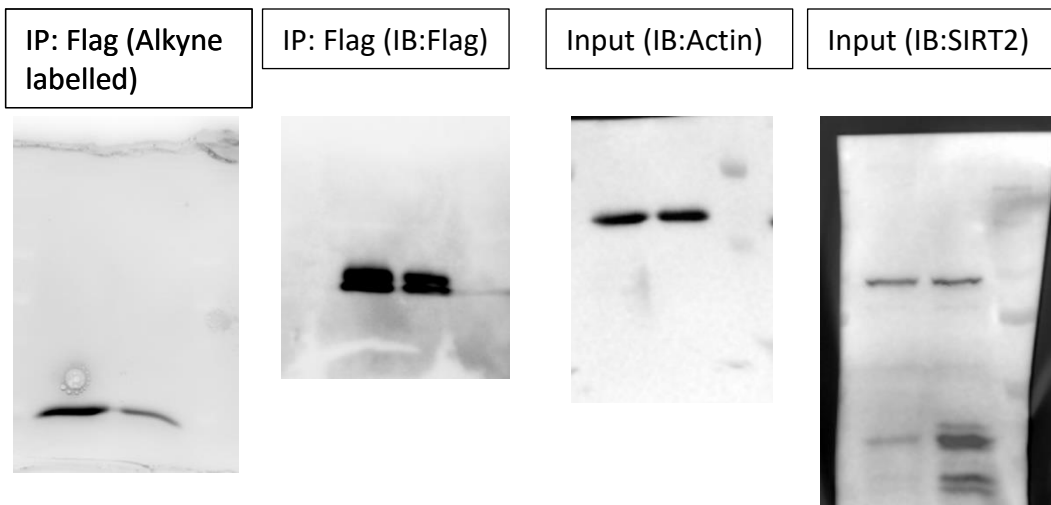

Figure 1-figure supplement 1, Source Data 1. Original membranes corresponding to Figure 1 supplement 1.
