# Supplementary material for: SIRT2-mediated ACSS2 K271 deacetylation suppresses lipogenesis under nutrient stress
Source: eLife journal article supplement (doi:10.7554/elife.97019), 2024-04-22
Supplement: fig1-figsupp4-data1 [file elife-97019-fig1-figsupp4-data1-v1.zip]

Ac-K IP (IB: Flag)

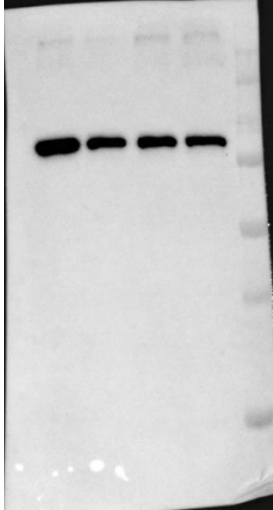

Input (IB: Flag)

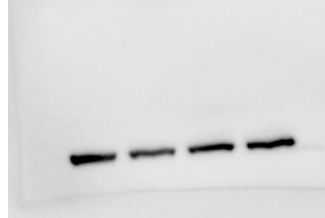

Input (IB: Actin)

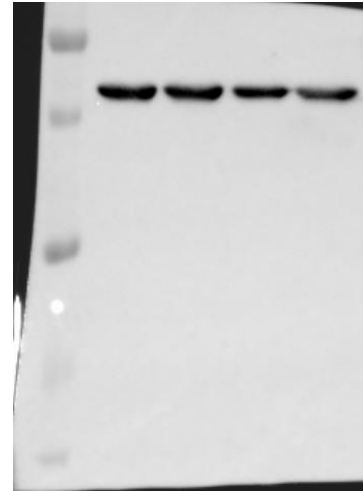

Figure 1-figure supplement 4, Source Data 1. Original membranes corresponding to Figure 1 supplement 4.
