# Supplementary material for: SIRT2-mediated ACSS2 K271 deacetylation suppresses lipogenesis under nutrient stress
Source: eLife journal article supplement (doi:10.7554/elife.97019), 2024-04-22
Supplement: fig2-data1 [file elife-97019-fig2-data1-v1.zip]

IP: Flag (IB:Flag)

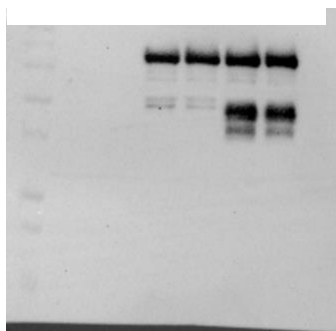

IP: Flag (IB:Ub)

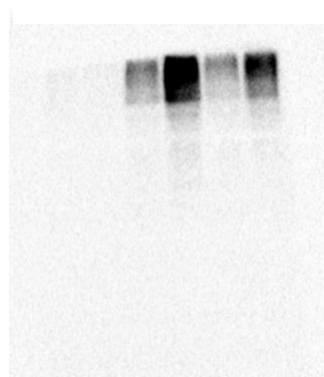

Figure 2, Source Data 1. Original membranes corresponding to Figure 2 E.

IP: Flag (IB: K48)

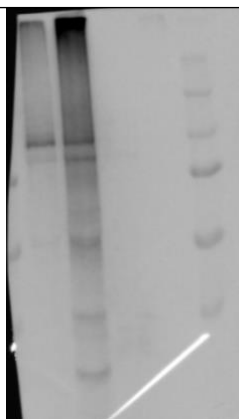

IP: Flag (IB: Flag)

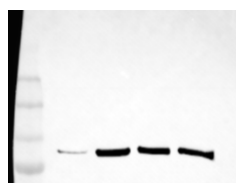

Input (IB: K48)

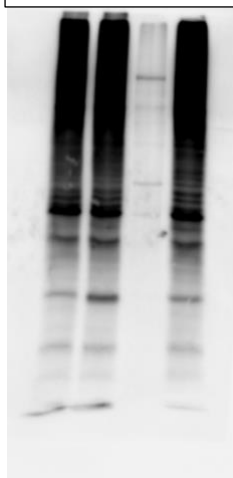

Input (IB: Actin)

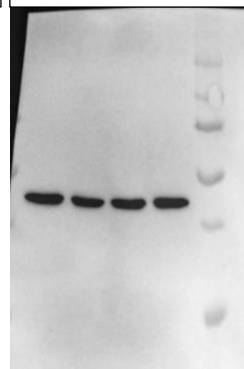

Input (IB: SIRT2)

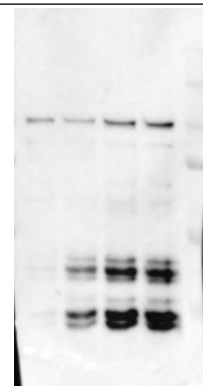

Figure 2, Source Data 1. Original membranes corresponding to Figure 2 F.

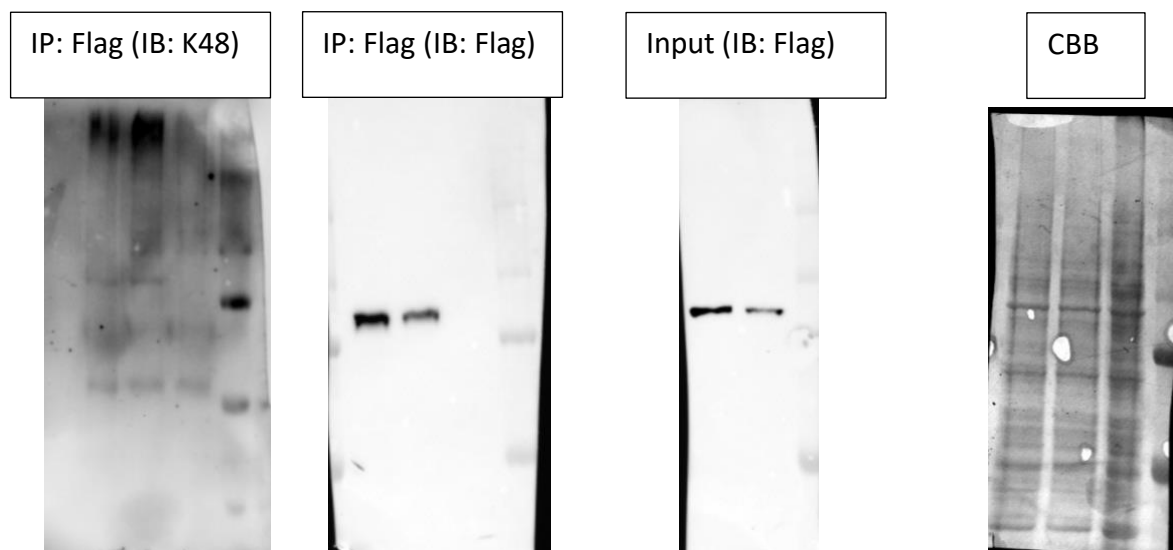

Figure 2, Source Data 1. Original membranes corresponding to Figure 2 G.

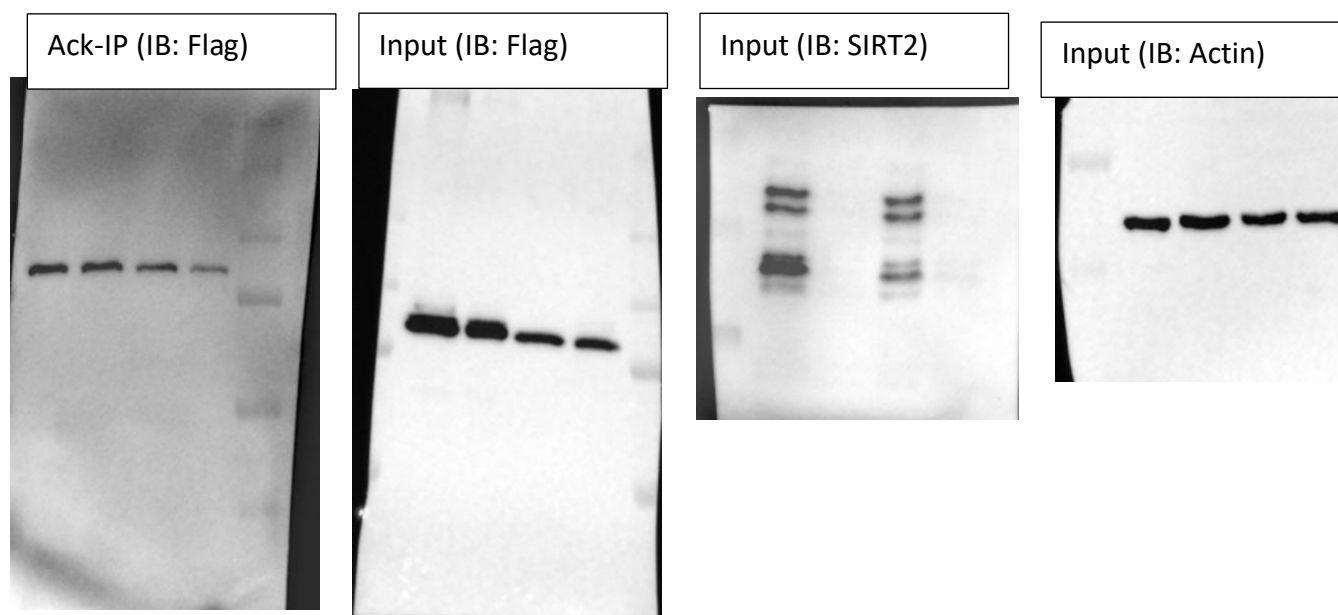

Figure 2, Source Data 1. Original membranes corresponding to Figure 2 H.

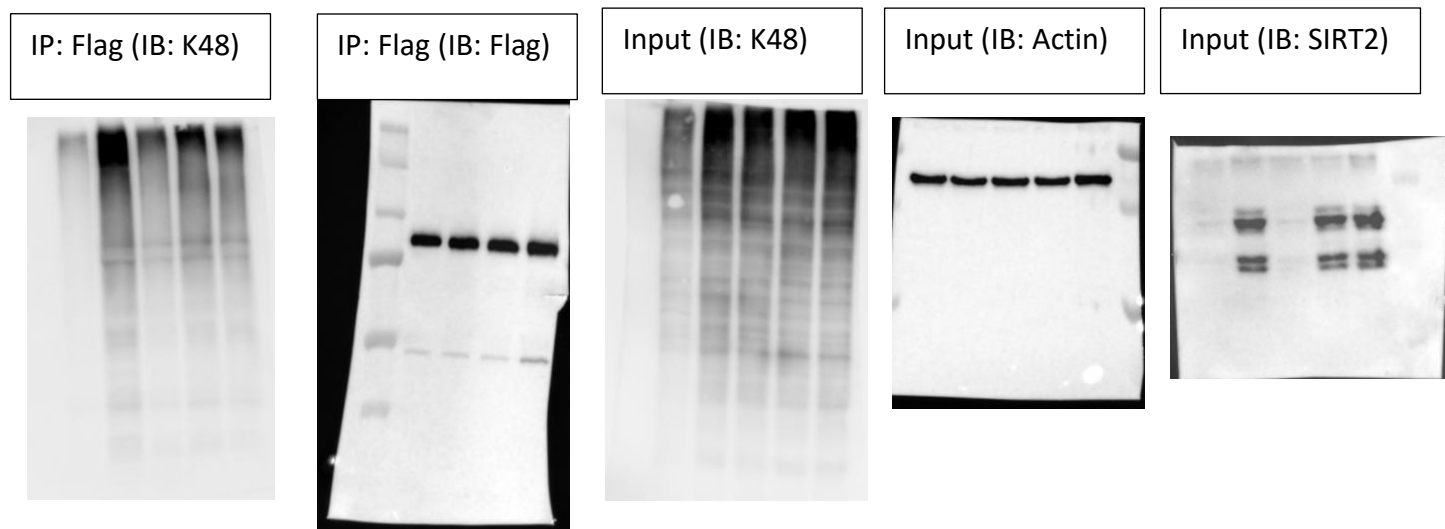

Figure 2, Source Data 1. Original membranes corresponding to Figure 2 I.
