# Supplementary material for: SIRT2-mediated ACSS2 K271 deacetylation suppresses lipogenesis under nutrient stress
Source: eLife journal article supplement (doi:10.7554/elife.97019), 2024-04-22
Supplement: fig2-figsupp6-data1 [file elife-97019-fig2-figsupp6-data1-v1.zip]

ACSS2

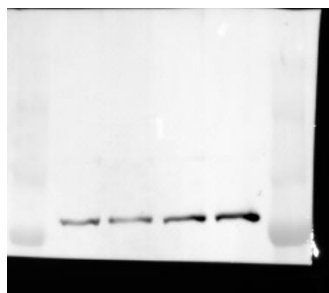

Actin

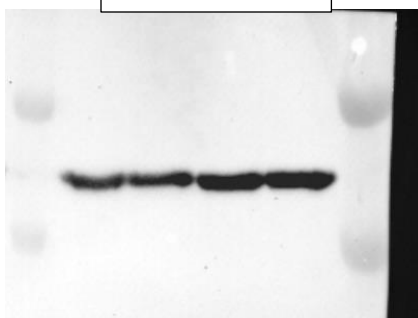

Figure 2-figure supplement 6, Source Data 1. Original membranes corresponding to Figure 2 supplement 6.
