# Supplementary material for: SIRT2-mediated ACSS2 K271 deacetylation suppresses lipogenesis under nutrient stress
Source: eLife. 2025 May 7;13:RP97019. doi: 10.7554/eLife.97019 (PMC12058118; doi:10.7554/eLife.97019)
Supplement: Figure 1—source data 3. [file elife-97019-fig1-data3.xlsx]

## Sheet: Sheet1
	Figure 1B- Data Set 2
		Raw Values
Condition		Acetylation	Flag (ACSS2)	Ac/Flag	Normalized to no stress SIRT2 Ctrl
No Stress	SIRT2 Ctrl	23504.9	54648.3	0.430112	1
No stress	SIRT2 KD	26229.3	51201.8	0.512272	1.19102
With Nutrient Stress	SIRT2 Ctrl	15140	24421.7	0.619939	1
With Nutrient Stress	SIRT2 KD	28362.9	22558.2	1.16138	1.87338
	Figure 1B- Data Set 2
		Raw Values
Condition		Acetylation	Flag (ACSS2)	Ac/Flag	Normalized to no stress SIRT2 Ctrl
No Stress	SIRT2 Ctrl	39449	54141.5	0.728627	1
No stress	SIRT2 KD	37770.6	52921.7	0.713707	0.979523
With Nutrient Stress	SIRT2 Ctrl	9290.22	35814.6	0.259398	1
With Nutrient Stress	SIRT2 KD	14174.5	34984.5	0.405165	1.56194
	Figure 1C- Data Set 1
		Raw Values
Condition		Acetylation	Flag (ACSS2)	Ac/Flag	Normalized to with AA SIRT2 Ctrl
With AA	SIRT2 Ctrl	6069.49	18784.4	0.323113	1
With AA	SIRT2 KD	5946.25	26164.4	0.227265	0.70336
Without AA	SIRT2 Ctrl	9018.51	27954.5	0.322613	0.998453
Without AA	SIRT2 KD	13366.6	31236	0.427922	1.32437
	Figure 1C- Data Set 2
		Raw Values
Condition		Acetylation	Flag (ACSS2)	Ac/Flag	Normalized to with AA SIRT2 Ctrl
With AA	SIRT2 Ctrl	11787.3	18535.9	0.635918	1
With AA	SIRT2 KD	10953.5	14905.5	0.734864	1.15559
Without AA	SIRT2 Ctrl	12537.4	17570.8	0.713535	1.12205
Without AA	SIRT2 KD	21365.5	17737.1	1.20456	1.89421
	Figure 1C- Data Set 3
		Raw Values
Condition		Acetylation	Flag (ACSS2)	Ac/Flag	Normalized to with AA SIRT2 Ctrl
With AA	SIRT2 Ctrl	4716.86	19709.4	0.239321	1
With AA	SIRT2 KD	5322.57	19512.2	0.272781	1.13982
Without AA	SIRT2 Ctrl	7060.15	21034.6	0.335644	1.40249
Without AA	SIRT2 KD	10505.4	21979.5	0.477965	1.99718
