# Supplementary material for: SIRT2-mediated ACSS2 K271 deacetylation suppresses lipogenesis under nutrient stress
Source: eLife. 2025 May 7;13:RP97019. doi: 10.7554/eLife.97019 (PMC12058118; doi:10.7554/eLife.97019)
Supplement: Figure 2—figure supplement 4—source data 1. [file elife-97019-fig2-figsupp4-data1.xlsx]

## Sheet: Sheet1
								Repeat 1				Repeat 2				Repeat 3
							TIME	ACSS2	Actin	ACSS2/actin		ACSS2	Actin	ACSS2/actin		ACSS2	Actin	ACSS2/actin
						SIRT2 Ctrl	0	8503.69	25999.5	0.327072		7381.74	20480.3	0.360431		13279.3	23694.7	0.560435
							2	6146.74	21819.1	0.281714		6570.08	23148.1	0.283829		9285.25	22394.7	0.414619
							4	6358.45	28386.1	0.223999		5689.79	21408.7	0.265771		5906.47	19711.4	0.299647
							6	6313.62	27806.4	0.227056		2921.67	25766.9	0.113388		5658.47	21834.2	0.259156
							8	4705.2	24080.9	0.195391						7835.59	19702.4	0.397697
							10	4835.5	23198.6	0.208439
						SIRT2 KD	0	6893.62	23830.4	0.289279		8771.28	24314.8	0.360738		10637.4	19459.7	0.546637
							2	8728.33	23807.9	0.366614		8340.15	22422.5	0.371955		8639.12	20037.9	0.431138
							4	9324.86	24494.8	0.380688		10092.9	23646.6	0.426821		9092.25	20953.8	0.433918
							6	10152.7	25030.9	0.405606		8941.15	24198.3	0.369495		12784.4	21189	0.60335
							8	11267.1	22325.5	0.504675		lost sample				13677.5	20886.8	0.65484
							10	12035.1	26778.3	0.449433		8845.67	24926.7	0.354868		lost sample
