# Supplementary material for: SIRT2-mediated ACSS2 K271 deacetylation suppresses lipogenesis under nutrient stress
Source: eLife. 2025 May 7;13:RP97019. doi: 10.7554/eLife.97019 (PMC12058118; doi:10.7554/eLife.97019)
Supplement: Figure 2—figure supplement 5—source data 1. [file elife-97019-fig2-figsupp5-data1.xlsx]

## Sheet: Sheet1
		Normal SIRT2 Ctrl	Normal SIRT2 KD	EBSS SIRT2 Ctrl	EBSS SIRT2 KD
		1.0574	0.731834	1.01203
		1.00786	0.644635	0.882984	0.739286
		1.01287	1.71683	1.38333	1.27911
		1.13857	1.78898	1.44356	1.09924
