# Supplementary material for: SIRT2-mediated ACSS2 K271 deacetylation suppresses lipogenesis under nutrient stress
Source: eLife. 2025 May 7;13:RP97019. doi: 10.7554/eLife.97019 (PMC12058118; doi:10.7554/eLife.97019)
Supplement: Figure 2—figure supplement 7—source data 1. [file elife-97019-fig2-figsupp7-data1.xlsx]

## Sheet: Sheet1
				WT		KR
			SIRT2	Ctrl	KD	Ctrl	KD
				1	1.5791	1.29976	1.06583
				1	2.27961	1.43016	1.21763
