# Supplementary material for: SIRT2-mediated ACSS2 K271 deacetylation suppresses lipogenesis under nutrient stress
Source: eLife. 2025 May 7;13:RP97019. doi: 10.7554/eLife.97019 (PMC12058118; doi:10.7554/eLife.97019)
Supplement: Figure 2—source data 3. [file elife-97019-fig2-data3.xlsx]

## Sheet: Sheet1
	Figure 2B- Data Set 1
		Raw Values
Condition		ACSS2	Actin	ACSS2/Actin	Normalized to with AA SIRT2 Ctrl
With AA	SIRT2 Ctrl	2901.84	36970.6	0.0784906	1
With AA	SIRT2 KD	4263.26	33120.7	0.128719	1.63993
Without AA	SIRT2 Ctrl	3968.13	26739.1	0.148402	1.8907
Without AA	SIRT2 KD	6492.08	25695	0.252659	3.21897
	Figure 2B- Data Set 2
		Raw Values
Condition		ACSS2	Actin	ACSS2/Actin	Normalized to with AA SIRT2 Ctrl
With AA	SIRT2 Ctrl	3119.26	20986.1	0.148635	1
With AA	SIRT2 KD	4590.08	19156.3	0.239612	1.61209
Without AA	SIRT2 Ctrl	5340.62	19196.6	0.278206	1.87175
Without AA	SIRT2 KD	7687.15	19148.7	0.401446	2.70089
	Figure 2B- Data Set 3
		Raw Values
Condition		ACSS2	Actin	ACSS2/Actin	Normalized to with AA SIRT2 Ctrl
With AA	SIRT2 Ctrl	3058.13	14094.1	0.216979	1
With AA	SIRT2 KD	3478.26	13103	0.265456	1.22342
Without AA	SIRT2 Ctrl	4608.13	13267.9	0.347314	1.60068
Without AA	SIRT2 KD	6845.26	11976.8	0.571541	2.63409
	Figure 2B- Data Set 4
		Raw Values
Condition		ACSS2	Actin	ACSS2/Actin	Normalized to with AA SIRT2 Ctrl
With AA	SIRT2 Ctrl	9602.75	16308.6	0.588817	1
With AA	SIRT2 KD	13121.6	22735.8	0.577133	0.980157
Without AA	SIRT2 Ctrl	10928.4	17407.5	0.627797	1.0662
Without AA	SIRT2 KD	21719.7	16174.1	1.34287	2.28062
		Figure 2C- Data Set 1
	Time	ACSS2	Actin	ACSS2/Actin
SIRT2 Ctrl	0	8503.69	25999.5	0.327072
	2	6146.74	21819.1	0.281714
	4	6358.45	28386.1	0.223999
	6	6313.62	27806.4	0.227056
	8	4705.2	24080.9	0.195391
	10	4835.5	23198.6	0.208439
SIRT2 KD	0	6893.62	23830.4	0.289279
	2	8728.33	23807.9	0.366614
	4	9324.86	24494.8	0.380688
	6	10152.7	25030.9	0.405606
	8	11267.1	22325.5	0.504675
	10	12035.1	26778.3	0.449433
		Figure 2C- Data Set 2
	Time	ACSS2	Actin	ACSS2/Actin
SIRT2 Ctrl	0	13279.3	23694.7	0.560435
	2	9285.25	22394.7	0.414619
	4	5906.47	19711.4	0.299647
	6	5658.47	21834.2	0.259156
	8	7835.59	19702.4	0.397697
	10	6239.55	22365.6	0.27898
SIRT2 KD	0	10637.4	19459.7	0.546637
	2	8639.12	20037.9	0.431138
	4	9092.25	20953.8	0.433918
	6	12784.4	21189	0.60335
	8	13677.5	20886.8	0.65484
	10	12540.5	20133.7	0.622865
		Figure 2C- Data Set 3
	Time	ACSS2	Actin	ACSS2/Actin
SIRT2 Ctrl	0	7381.74	20480.3	0.360431
	2	6570.08	23148.1	0.283829
	4	5689.79	21408.7	0.265771
	6	2921.67	25766.9	0.113388
	10	5815.58	29167.1	0.199389
SIRT2 KD	0	8771.28	24314.8	0.360738
	2	8340.15	22422.5	0.371955
	4	10092.9	23646.6	0.426821
	6	8941.15	24198.3	0.369495
	10	7825.65	20146.4	0.38844
	Figure 2D Data Set
	MG132	ACSS2	Actin	ACSS2/Actin
1	Without	19787.7	35348.6	0.559788
	with	30210.7	29304.6	1.03092
2	without	25108	34406.9	0.729736
	with	39384.3	29252.3	1.34637
3	without	18200.8	35243.6	0.516428
	with	32427.4	32889.9	0.985937
	Figure 2I Data Set
1	ACSS2	SIRT2	Ub	Flag	Ub/Flag
	WT	Ctrl	63779.5	17690	3.6054
	WT	KD	35214.6	14717	2.39278
	K271R	Ctrl	31761.9	13279.4	2.39182
	K271R	KD	24874.6	10949.9	2.27167
2	ACSS2	SIRT2	Ub	Flag	Ub/Flag
	WT	Ctrl	62954	21312.2	2.9539
	WT	KD	43444.7	23062.8	1.88375
	K271R	Ctrl	65898.2	22870.2	2.8814
	K271R	KD	58810	23249.3	2.52954
3	ACSS2	SIRT2	Ub	Flag	Ub/Flag
	WT	Ctrl	74629.8	17720.4	4.21152
	WT	KD	41018	19128.5	2.14434
	K271R	Ctrl	28782.6	19645.2	1.46512
	K271R	KD	29802.9	21575.7	1.38132
4	ACSS2	SIRT2	Ub	Flag	Ub/Flag
	WT	Ctrl	62984.7	22361.5	2.81665
	WT	KD	56297.4	22361.5	2.5176
	K271R	Ctrl	41144.5	24087.9	1.7081
	K271R	KD	35075.2	29305.5	1.19688
	Figure 2J- Data Set 1
	Time	ACSS2	Actin	ACSS2/Actin
WT	0	19800.5	43608.2	0.454054
	4	20048.9	44504.2	0.450496
	6	12092.3	47628.5	0.253887
	10	10639.9	45796.2	0.232332
KR	0	16436.9	26636.6	0.617081
	4	16042.1	23357.5	0.686807
	6	16902	27066.6	0.624458
	10	13699.4	20143.5	0.680091
	Figure 2J- Data Set 2
	Time	ACSS2	Actin	ACSS2/Actin
WT	0	6779.15	31350.6	0.216237
	4	6335.15	25240.9	0.250987
	6	5447.03	25004.2	0.217845
	10	2746.72	24039.6	0.114258
KR	0	12082	20775.8	0.581539
	4	12376.7	23408.5	0.528724
	6	11305.6	25020.2	0.451859
	10	11970	22604.5	0.529541
	Figure 2J- Data Set 3
	Time	ACSS2	Actin	ACSS2/Actin
WT	0	5974.43	29188.4	0.204685
	4	3879.18	29250.6	0.132619
	6	3513.06	26323.9	0.133455
	10	3326.88	25987.2	0.12802
KR	0	6592.6	23291.6	0.283047
	4	6666.31	24579.9	0.27121
	6	7032.26	25866.9	0.271863
	10	5715.65	21410.2	0.266959
