# Supplementary material for: SIRT2-mediated ACSS2 K271 deacetylation suppresses lipogenesis under nutrient stress
Source: eLife. 2025 May 7;13:RP97019. doi: 10.7554/eLife.97019 (PMC12058118; doi:10.7554/eLife.97019)
Supplement: Figure 3—source data 3. [file elife-97019-fig3-data3.xlsx]

## Sheet: Sheet1
										Final Data
Data Set 1
	replicate 1	replicate 2	replicate 3	Average	Normalized to EV					EV	EV+Tm	WT	WT+Tm	K271R	K271R+Tm
ev	0.081	0.079	0.08	0.08	1					1	1.16786	1.21786	1.63214	1.36787	1.48572
ev+tm	0.097	0.102	0.104	0.101	1.2625					1	1.15576	1.19583	1.36667	1.25234	1.30841
wt	0.102	0.1	0.1	0.100667	1.25833					1	1.2625	1.25833	1.47917	1.42917	1.475
wt+tm	0.115	0.12	0.12	0.118333	1.47917
r	0.116	0.111	0.116	0.114333	1.42917
r +tm	0.114	0.12	0.12	0.118	1.475
Data set 2
	replicate 1	replicate 2	replicate 3	Average	Normalized to EV
ev	0.093	0.094	0.093	0.093333	1
ev+tm	0.108	0.107	0.106	0.107	1.16786
wt	0.114	0.113	0.114	0.113667	1.21787
wt+tm	0.13	0.162	0.165	0.152333	1.63215
r	0.125	0.123	0.135	0.127667	1.36787
r +tm	0.133	0.162	0.121	0.138667	1.48572
