# Supplementary figures and images for: SIRT2-mediated ACSS2 K271 deacetylation suppresses lipogenesis under nutrient stress
Source: eLife journal article supplement (doi:10.7554/elife.97019), 2024-04-22

IB:ACSS2

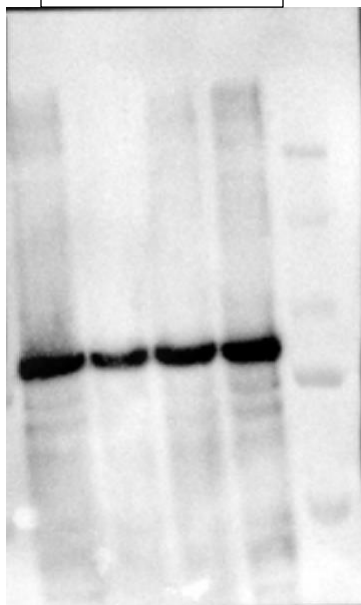

IB:SIRT2

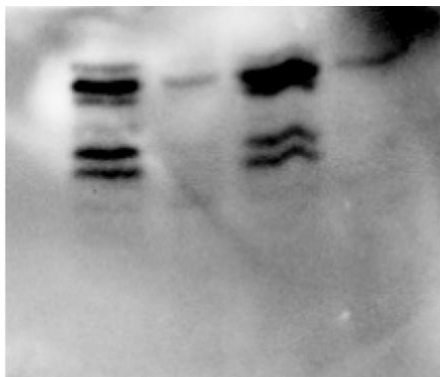

IB:Actin

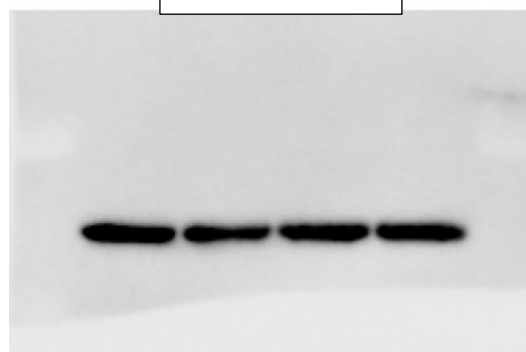

IB:ACSS2

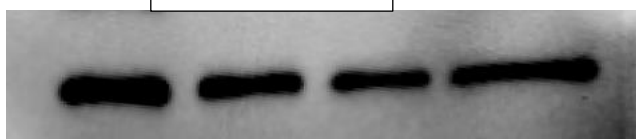

Supplement: fig1-figsupp5-data1 [file elife-97019-fig1-figsupp5-data1-v1.zip]

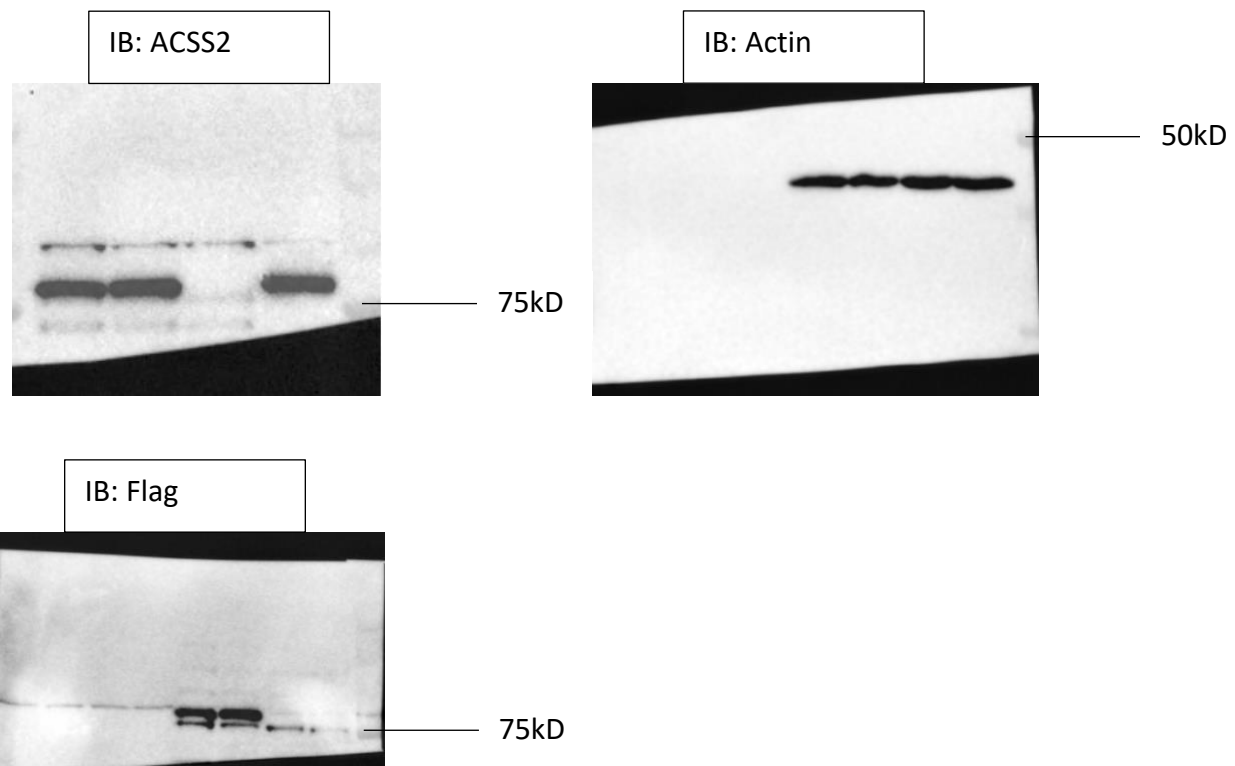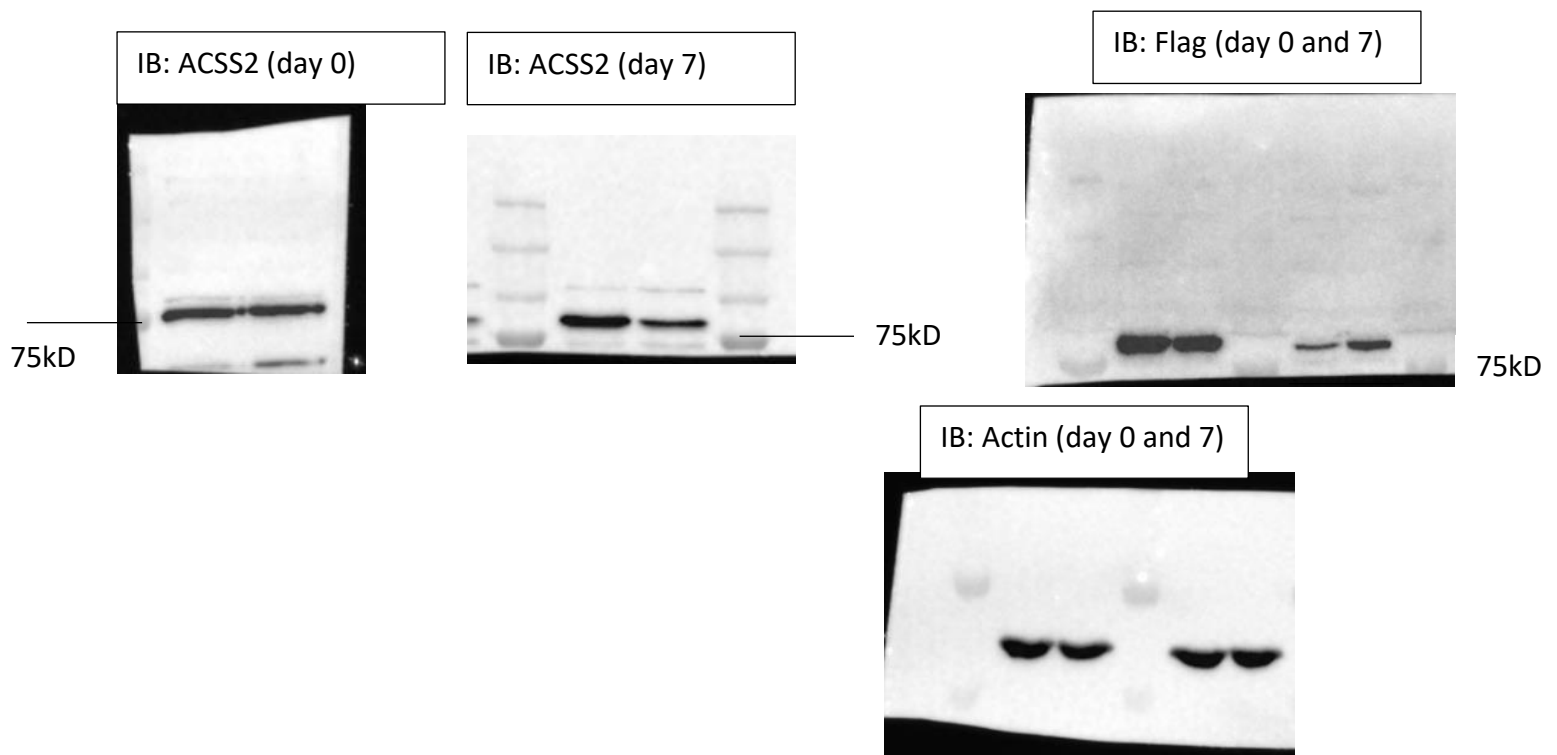

Supplement: fig3-data1 [file elife-97019-fig3-data1-v1.zip]
